# Supplementary material
Source: HighWire-hosted journal article supplement (https://sit.bmj.com/highwire/filestream/493/field_highwire_adjunct_files/0/bmjsit-2022-000131supp001_data_supplement.pdf)
Supplement: bmjsit-2022-000131supp001_data_supplement.pdf [file bmjsit-2022-000131supp001_data_supplement.pdf]

**Supplementary Table 1**

## Procedure Codes for Primary Procedures and Reinterventions

| Category       | JMDC code | Definition                                                   | ICD-9-cm (*) |
|----------------|-----------|--------------------------------------------------------------|--------------|
| Exclude (TAA)  | 150150010 | Resection of thoracic aorta (arch)                           | 3845         |
| Exclude (TAA)  | 150150110 | Resection of thoracic aorta (descending)                     | 3845         |
| Exclude (TAA)  | 150244910 | Resection of thoracic aorta (ascending)(plasty)              | 3845         |
| Exclude (TAA)  | 150245010 | Resection of thoracic aorta (ascending)(other)               | 3845         |
| Include (OAR)  | 150245110 | Resection of abdominal aorta (with anastomosis)              | 3834         |
| Include (OAR)  | 150245210 | Resection of abdominal aorta (other)                         | 3844         |
| Include (OAR)  | 150246810 | Resection of abdominal aorta (thoracoabdominal)              | 3844         |
| Exclude (TAA)  | 150275910 | Resection of thoracic aorta (ascending and arch)(other)      | 3844         |
| Include (EVAR) | 150301310 | Endovascular implantation graft (thoracic)                   | 3973         |
| Include (EVAR) | 150301410 | Endovascular implantation graft (abdominal)                  | 3971         |
| Include (EVAR) | 150301510 | Endovascular implantation graft (aortic branch)              | 3978         |
| Exclude (TAA)  | 150359510 | Resection of thoracic aorta (ascending)(valve)               | 3845         |
| Exclude (TAA)  | 150359610 | Resection of thoracic aorta (ascending)(root)                | 3845         |
| Exclude (TAA)  | 150359710 | Resection of thoracic aorta (ascending and arch)(plasty)     | 3845         |
| Exclude (TAA)  | 150359810 | Resection of thoracic aorta (ascending and arch)(valve)      | 3845         |
| Exclude (TAA)  | 150375870 | Resection of thoracic aorta (ascending and arch)(root)       | 3845         |
| Include (REDO) | 150380670 | Monitoring of spinal code evoked potential                   | N/A          |
| Exclude (TAA)  | 150381550 | Open stent graft implantation (arch)                         | 3954         |
| Exclude (TAA)  | 150381650 | Open stent graft implantation (ascending and arch)(valve)    | 3954         |
| Exclude (TAA)  | 150381750 | Open stent graft implantation (ascending and arch)(plasty)   | 3954         |
| Exclude (TAA)  | 150381850 | Open stent graft implantation (ascending and arch)(root)     | 3954         |
| Exclude (TAA)  | 150381950 | Open stent graft implantation (ascending and arch)(plasty)   | 3954         |
| Keep (REDO)    | 150400410 | Stent graft implantation (repair)                            | 3990         |
| Keep (REDO)    | 150153750 | Endovascular embolization or occlusion (abdominal)           | 3975         |
| Keep (REDO)    | 150360610 | Endovascular embolization or occlusion (bleeding)            | 3975         |
| Keep (REDO)    | 150360710 | Endovascular embolization or occlusion (other)               | 3975         |
| Keep (REDO)    | 150376810 | Endovascular embolization or occlusion (thrombus)            | 3975         |
| Keep (REDO)    | 150149410 | Endarterectomy of aorta                                      | 3814         |
| Keep (REDO)    | 150153810 | Angioplasty / atherectomy of other noncoronary vessels       | 3950         |
| Keep (REDO)    | 150153450 | Vascular shunt (Autograft)                                   | 3929         |
| Keep (REDO)    | 150150410 | Vascular shunt (Thoracic Cavity, excluding Thoracic Aorta)   | 3929         |
| Keep (REDO)    | 150150510 | Vascular shunt (Abdominal Cavity, excluding Abdominal Aorta) | 3929         |
| Keep (REDO)    | 150150610 | Vascular shunt (Other)                                       | 3929         |
| Keep (REDO)    | 150151350 | Vascular shunt (Peripheral Artery)                           | 3929         |
| Keep (REDO)    | 150152310 | Vascular bypass (Thoracic Cavity)                            | 3929         |
| Keep (REDO)    | 150152410 | Vascular bypass (Abdominal Cavity)                           | 3929         |
| Keep (REDO)    | 150152710 | Vascular bypass (Other)                                      | 3929         |
| Keep (REDO)    | 150153750 | Venous occlusion (Abdominal Cavity)                          | 3929         |
| Keep (REDO)    | 150154710 | Venous occlusion (Thoracic Cavity)                           | 3929         |
| Keep (REDO)    | 150154810 | Venous anastomosis (Abdominal Cavity)                        | 3929         |
| Keep (REDO)    | 150154910 | Venous anastomosis (Other)                                   | 3929         |
| Keep (REDO)    | 150360510 | Vascular bypass (Lower extremity)                            | 3929         |
| Keep (REDO)    | 150387810 | Vascular bypass (Below the knee)                             | 3929         |
| Keep (REDO)    | 150347210 | Percutaneous aortic blockade                                 | 3891         |
| Keep (REDO)    | 150180210 | Procedures for ileus and intestinal obstructions             | 5459         |
| Keep (REDO)    | 150180350 | Procedures for ileus and intestinal obstructions             | 5459         |
| Keep (REDO)    | 150180650 | Procedures for ileus, small intestine (excluding malignancy) | 4562         |
| Keep (REDO)    | 150271550 | Procedures for ileus, laparoscopic                           | 5451         |
| Keep (REDO)    | 140007010 | Procedures for ileus, transluminal                           | 9608         |

AAA: Abdominal Aorta Aneurysm,  
TAA: Thoracic Aorta Aneurysm  
ICD-9-cm: International Classification of Diseases 9th Revision Clinical Modification,  
JMDC: Japan Medical Data Center  
Exclude: exclude patients who underwent TAA repair  
Include: include patients who underwent AAA repair / reintervention  
REDO: reintervention,  
(\* ) Note: JMDC procedure codes do not correspond one-to-one to ICD-9-CM.

**Supplementary Table 2**

## Patient Selection and Device Use in Japan

| AAA    | Age    | %female | %rAAA | %EVAR  |        |
|--------|--------|---------|-------|--------|--------|
| JSVS   | 19,144 | 17.6%   | 15.2% | 60.2%  |        |
| JACSM  | 37,261 | 77.0    | 17.2% | 0.0%   | 100.0% |
| Age_60 | 1,240  |         | 0.0%  | 100.0% |        |
| _61_70 | 6,861  |         | 0.0%  | 100.0% |        |
| _71_80 | 16,560 |         | 0.0%  | 100.0% |        |
| _81_90 | 11,929 |         | 0.0%  | 100.0% |        |
| 91_    | 661    |         | 0.0%  | 100.0% |        |
| JROAD  | 2,320  | 75.4    | 23.0% | 100.0% | 24.4%  |
| Age_80 | 1,987  | 69.7    | 17.0% | 100.0% | 20.7%  |
| 81_    | 1,982  | 86.2    | 41.8% | 100.0% | 30.3%  |
| JMDC   | 986    | 62.4    | 10.0% | 15.1%  | 28.7%  |

|          |                                                        |
|----------|--------------------------------------------------------|
| JSVS:    | Japanese Society of Vascular Surgery                   |
| JACSM:   | Japan Committee for Stentgraft Management              |
| JROAD:   | Japanese Registry of All Cardiac and Vascular Diseases |
| JMDC:    | Japan Medical Data Center                              |
| AAA:     | Abdominal Aortic Aneurysm                              |
| iAAA:    | intact AAA                                             |
| rAAA:    | ruptured AAA                                           |
| EVAR:    | Endovascular Aortic Repair                             |
| OAR:     | Open Aortic Repair                                     |
| %female: | proportion of female in patient (percent)              |
| %rAAA:   | proportion of ruptured AAA ( rAAA / (rAAA + iAAA) )    |
| %EVAR:   | proportion of EVAR ( EVAR / (EVAR + OAR) )             |

JSVS.: The Japanese Society For Vascular Surgery Database Management Committee M, Ncd Vascular Surgery Data Analysis T. Vascular Surgery in Japan: 2016 Annual Report by the Japanese Society for Vascular Surgery. *Ann Vasc Dis* 2021;14(4):419-38. doi: 10.3400/avd.ar.21-00110

JSCSM.: Hoshina K, Ishimaru S, Sasabuchi Y, et al. Outcomes of Endovascular Repair for Abdominal Aortic Aneurysms: A Nationwide Survey in Japan. *Ann Surg* 2019;269(3):564-73. doi: 10.1097/SLA.0000000000002508

JROAD: Yamaguchi T, Nakai M, Sumita Y, et al. Editor's Choice - Endovascular Repair Versus Surgical Repair for Japanese Patients With Ruptured Thoracic and Abdominal Aortic Aneurysms: A Nationwide Study. *Eur J Vasc Endovasc Surg* 2019;57(6):779-86. doi: 10.1016/j.ejvs.2019.01.027 [published Online First: 20190302]

JROAD: Yamaguchi T, Nakai M, Sumita Y, et al. Impact of Endovascular Repair on the Outcomes of Octogenarians with Ruptured Abdominal Aortic Aneurysms: A Nationwide Japanese Study. *Eur J Vasc Endovasc Surg* 2020;59(2):219-25. doi: 10.1016/j.ejvs.2019.07.016 [published Online First: 20191213]

**Supplementary Table 3****Short- and Long-term Outcomes of OAR and EVAR****(A) Intact Abdominal Aortic Aneurysm (iAAA)**

| (A)<br>iAAA | Age    | %female | months | %EVAR  | OAR    |       |       | EVAR   |       |       |      |
|-------------|--------|---------|--------|--------|--------|-------|-------|--------|-------|-------|------|
|             |        |         |        |        | %short | %long | %redo | %short | %long | %redo |      |
| JSVS        | 6,497  |         |        | 62.7%  | 0.8%   |       |       | 0.5%   |       |       |      |
| JACSM       | 37,261 | 77.0    | 17.2%  | 79.0   | 100.0% |       |       | 1.1%   | 9.3%  | 16.7% |      |
| Age_60      | 1,240  |         |        | 100.0% |        |       |       | 0.5%   | 4.5%  | 9.8%  |      |
| _61_70      | 6,861  |         |        | 100.0% |        |       |       | 0.4%   | 5.5%  | 11.7% |      |
| _71_80      | 16,560 |         |        | 100.0% |        |       |       | 0.9%   | 8.5%  | 15.7% |      |
| _81_90      | 11,929 |         |        | 100.0% |        |       |       | 1.7%   | 12.8% | 21.4% |      |
| 91_         | 661    |         |        | 100.0% |        |       |       | 3.5%   | 15.4% | 25.3% |      |
| JROAD       |        |         |        | N/A    |        |       |       |        |       |       |      |
| Age_80      |        |         |        | N/A    |        |       |       |        |       |       |      |
| 81_         |        |         |        | N/A    |        |       |       |        |       |       |      |
| JMDC        | 837    | 62.9    | 9.7%   | 23.4   | 29.2%  | 2.0%  | 5.7%  | 11.0%  | 2.9%  | 3.7%  | 7.8% |

**(B) Ruptured Abdominal Aortic Aneurysm (rAAA)**

| (B)<br>rAAA | Age   | %female | months | %EVAR | OAR    |       |       | EVAR   |       |       |       |
|-------------|-------|---------|--------|-------|--------|-------|-------|--------|-------|-------|-------|
|             |       |         |        |       | %short | %long | %redo | %short | %long | %redo |       |
| JSVS        | 1,167 |         |        | 35.9% | 15.7%  |       |       | 15.3%  |       |       |       |
| JACSM       |       |         |        | N/A   |        |       |       |        |       |       |       |
| Age_60      |       |         |        | N/A   |        |       |       |        |       |       |       |
| _61_70      |       |         |        | N/A   |        |       |       |        |       |       |       |
| _71_80      |       |         |        | N/A   |        |       |       |        |       |       |       |
| _81_90      |       |         |        | N/A   |        |       |       |        |       |       |       |
| 91_         |       |         |        | N/A   |        |       |       |        |       |       |       |
| JROAD       | 2,320 | 75.4    | 23.0%  | 24.4% | 22.4%  |       |       | 24.6%  |       |       |       |
| Age_80      | 1,420 | 69.3    |        | 20.7% | 18.9%  |       |       | 23.5%  |       |       |       |
| 81_         | 534   | 85.0    |        | 30.3% | 28.8%  |       |       | 25.7%  |       |       |       |
| JMDC        | 149   | 59.8    | 10.1%  | 16.5  | 26.2%  | 9.1%  | 12.7% | 8.2%   | 10.3% | 12.8% | 20.5% |

JSVS: Japanese Society of Vascular Surgery  
 JACSM: Japan Committee for Stentgraft Management  
 JROAD: Japanese Registry of All Cardiac and Vascular Diseases  
 JMDC: Japan Medical Data Center  
 AAA: Abdominal Aortic Aneurysm  
 iAAA: intact AAA  
 rAAA: ruptured AAA  
 EVAR: Endovascular Aortic Repair  
 OAR: Open Aortic Repair  
 %female: proportion of female in patient (percent)  
 %EVAR: proportion of EVAR ( EVAR / (EVAR + OAR) )  
 %short: short-term mortality (30-day mortality or in-hospital mortality)  
 %long: long-term mortality (5-year mortality or overall mortality)  
 %redo: reintervention

- JSVS. The Japanese Society For Vascular Surgery Database Management Committee M, Ncd Vascular Surgery Data Analysis T. Vascular Surgery in Japan: 2016 Annual Report by the Japanese Society for Vascular Surgery. *Ann Vasc Dis* 2021;14(4):419-38. doi: 10.3400/avd.ar.21-00110
- JACSM. Hoshina K, Ishimaru S, Sasabuchi Y, et al. Outcomes of Endovascular Repair for Abdominal Aortic Aneurysms: A Nationwide Survey in Japan. *Ann Surg* 2019;269(3):564-73. doi: 10.1097/SLA.0000000000002508
- JROAD. Yamaguchi T, Nakai M, Sumita Y, et al. Editor's Choice - Endovascular Repair Versus Surgical Repair for Japanese Patients With Ruptured Thoracic and Abdominal Aortic Aneurysms: A Nationwide Study. *Eur J Vasc Endovasc Surg* 2019;57(6):779-86. doi: 10.1016/j.ejvs.2019.01.027 [published Online First: 20190302]
- JROAD. Yamaguchi T, Nakai M, Sumita Y, et al. Impact of Endovascular Repair on the Outcomes of Octogenarians with Ruptured Abdominal Aortic Aneurysms: A Nationwide Japanese Study. *Eur J Vasc Endovasc Surg* 2020;59(2):219-25. doi: 10.1016/j.ejvs.2019.07.016 [published Online First: 20191213]
